# Supplementary material
Source: publisher figshare collection journal article supplement (https://karger.figshare.com/ndownloader/files/12454292)
Supplement: Supplementary file 1 [file 12454292]

**Supplemental Table S2. Summary of Group Differences in FA between PTSD and Combat Controls**

|  | **Group Difference** | |  | **PTSD** | |  | **Non-PTSD** | |
| --- | --- | --- | --- | --- | --- | --- | --- | --- |
| **Tract/FA** | ***F*** | ***p*** |  | ***EMM*** | ***SEM*** |  | ***EMM*** | ***SEM*** |
| fmajor (log10) | .359 | .551 |  | -.201 | .006 |  | -.196 | .006 |
| fminor | 1.819 | .183 |  | .461 | .015 |  | .430 | .015 |
| ATR (LH) | 1.768 | .189 |  | .368 | .007 |  | .335 | .007 |
| ATR (RH) | .191 | .664 |  | .351 | .008 |  | .356 | .008 |
| CAB (LH) | 5.035 | **.029*** |  | .294 | .006 |  | .273 | .006 |
| CAB (RH; log10) | .265 | .609 |  | -.543 | .014 |  | -.533 | .014 |
| CCG (LH) | .418 | .520 |  | .504 | .011 |  | .493 | .011 |
| CCG (RH) | .103 | .750 |  | .453 | .011 |  | .448 | .011 |
| CST (LH) | 2.466 | .122 |  | .450 | .009 |  | .429 | .009 |
| CST (RH) | .063 | .802 |  | .424 | .008 |  | .421 | .008 |
| ILF (LH) | 3.516 | .066 |  | .473 | .008 |  | .450 | .008 |
| ILF (RH) | .054 | .816 |  | .451 | .008 |  | .448 | .008 |
| SLFP (LH) | .579 | .450 |  | .419 | .009 |  | .408 | .009 |
| SLFP (RH) | .658 | .421 |  | .398 | .009 |  | .387 | .009 |
| SLFT (LH) | .229 | .634 |  | .422 | .007 |  | .417 | .007 |
| SLFT (RH) | 3.240 | .077**T** |  | .398 | .008 |  | .377 | .008 |
| UNC (LH; log10) | .026 | .872 |  | -.437 | .009 |  | -.439 | .009 |
| UNC (RH) | .406 | .527 |  | .356 | .006 |  | .351 | .006 |

Results of a multivariate general linear model analysis comparing FA in probabilistic white matter tracts between PTSD and Combat Control groups. FA, fractional anisotropy; LH, left hemisphere; RH, right hemisphere; F, effect size of between-group effects controlling for age, sex, head motion, and antidepressant use; EMM, estimated marginal mean FA values; SEM, standard error of the mean; log10, tract FA values were log10 transformed due to non-normality of the raw data; fmajor, corpus callosum forceps major; fminor, corpus callosum forceps minor; ATR, anterior thalamic radiations; CAB, cingulum angular bundle; CCG, cingulum cingulate gyrus endings; CST, corticospinal tract; ILF, inferior longitudinal fasciculus; SLFP, superior longitudinal fasciculus parietal endings; SLFT, superior longitudinal fasciculus temporal endings; UNC, uncinate fasciculus. *indicates significance if *p* ≤ 0.05.Group comparison results were not corrected for multiple comparisons.
